# Supplementary material for: The history of human populations in the Japanese Archipelago inferred from genome-wide SNP data with a special reference to the Ainu and the Ryukyuan populations
Source: Springer Nature journal article supplement (doi:10.1038/jhg.2012.114), 2012-11-08
Supplement: 10038_2012_BFjhg2012114_MOESM397_ESM.pdf [file 10038_2012_BFjhg2012114_MOESM397_ESM.pdf]

**Supplementary Table 1:** SNP filtering applied to the Japanese and HapMap dataset

| Population        | No. samples | Number of SNPs omitted      |               | Remaining SNP |
|-------------------|-------------|-----------------------------|---------------|---------------|
|                   |             | Genotyping call rate (<95%) | HWE (p<0.001) |               |
| Ainu              | 36          | 212,448 <sup>†</sup>        | 449           | 655,788       |
| Ryukyu            | 35          | 29,874                      | 538           | 837,845       |
| Mainland Japanese | 198         | 17,169                      | 1888          | 849,200       |
| CHB               | 42          | 3,069                       | 336           | 864,852       |
| JPT               | 45          | 5,004                       | 446           | 862,807       |
| CEU               | 89          | 4,887                       | 514           | 862,856       |
| YRI               | 89          | 4,780                       | 706           | 862,771       |

<sup>†</sup>Includes SNP omitted based on confidence scores

**Supplementary Table 2.** East Asian populations from HDGP-CEPH and PASNP datasets which were merged with the Japanese-HapMap datasets

| <b>Population ID</b> | <b>Ethnicity</b>  | <b>n</b> | <b>Dataset</b> | <b>Geographical origin</b> |
|----------------------|-------------------|----------|----------------|----------------------------|
| Dai                  | Dai               | 10       | HGDP-CEPH      | China                      |
| Daur                 | Daur              | 9        | HGDP-CEPH      | China                      |
| Han                  | Han               | 44       | HGDP-CEPH      | China                      |
| Hezhen               | Hezhen            | 9        | HGDP-CEPH      | China                      |
| Japanese             | Japanese          | 28       | HGDP-CEPH      | Japan                      |
| Lahu                 | Lahu              | 8        | HGDP-CEPH      | China                      |
| Miaozu               | Miaozu            | 10       | HGDP-CEPH      | China                      |
| Mongolia             | Mongolia          | 10       | HGDP-CEPH      | China                      |
| Naxi                 | Naxi              | 8        | HGDP-CEPH      | China                      |
| Oroqen               | Oroqen            | 9        | HGDP-CEPH      | China                      |
| She                  | She               | 10       | HGDP-CEPH      | China                      |
| Tu                   | Tu                | 10       | HGDP-CEPH      | China                      |
| Tujia                | Tujia             | 10       | HGDP-CEPH      | China                      |
| Xibo                 | Xibo              | 9        | HGDP-CEPH      | China                      |
| Yakut                | Yakut             | 25       | HGDP-CEPH      | Siberia                    |
| Yizu                 | Yizu              | 10       | HGDP-CEPH      | China                      |
| AX-AM                | Ami               | 10       | PASNP          | Taiwan                     |
| AX-AT                | Atayal            | 10       | PASNP          | Taiwan                     |
| CN-CC                | Zhuang            | 26       | PASNP          | China                      |
| CN-HM                | Hmong             | 26       | PASNP          | China                      |
| CN-UG                | Ugyur             | 26       | PASNP          | China                      |
| CN-SH                | Han               | 21       | PASNP          | China                      |
| CN-JN                | Jinuo             | 29       | PASNP          | China                      |
| JP-ML                | Mainland Japanese | 71       | PASNP          | Japan                      |
| JP-RK                | Ryukyu            | 49       | PASNP          | Japan                      |
| CN-WA                | Wa                | 56       | PASNP          | China                      |
| KR-KR                | Korean            | 90       | PASNP          | Korea                      |
| TW-HA                | Han               | 80       | PASNP          | Taiwan                     |
| CN-JI                | Jiamao            | 31       | PASNP          | China                      |
| CN-GA                | Han               | 30       | PASNP          | China                      |

**Supplementary Figure 1:** PCA plot (PC1 and PC2) of three populations in the Japanese Archipelago and four populations of the HapMap dataset

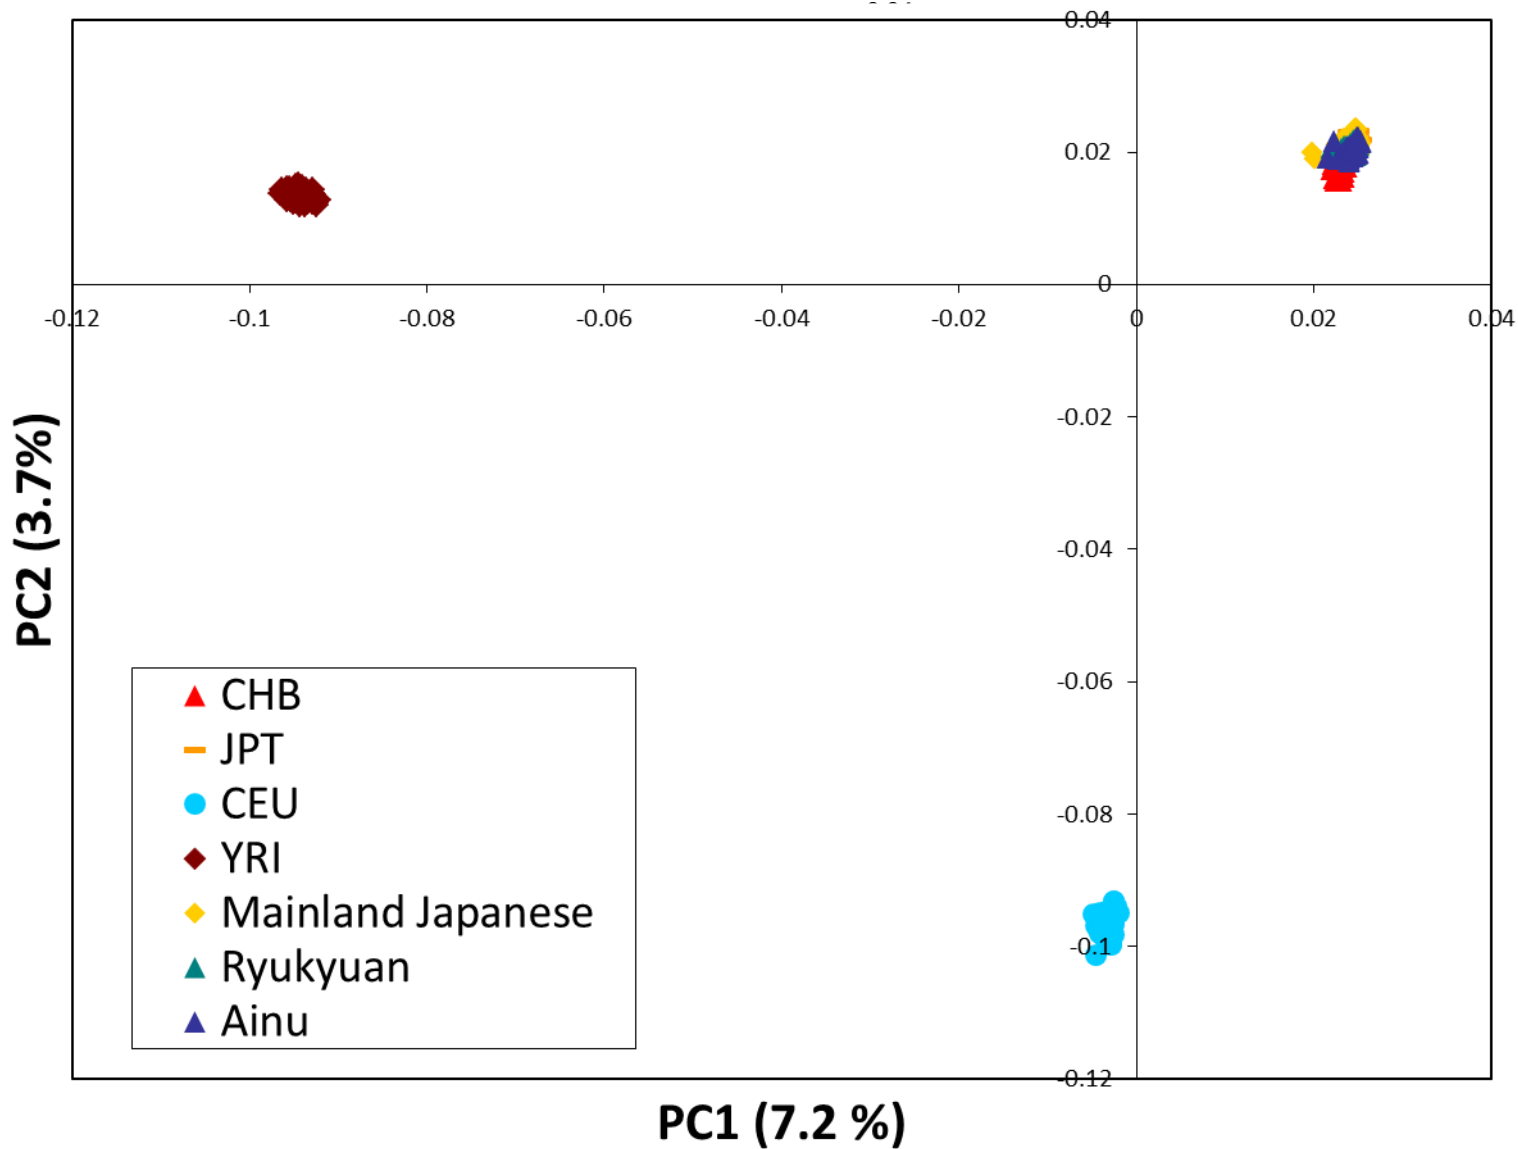

**Supplementary Figure 2:** PCA plot (PC1 and PC2) of three populations in the Japanese Archipelago and three populations of the HapMap dataset (African population was excluded)

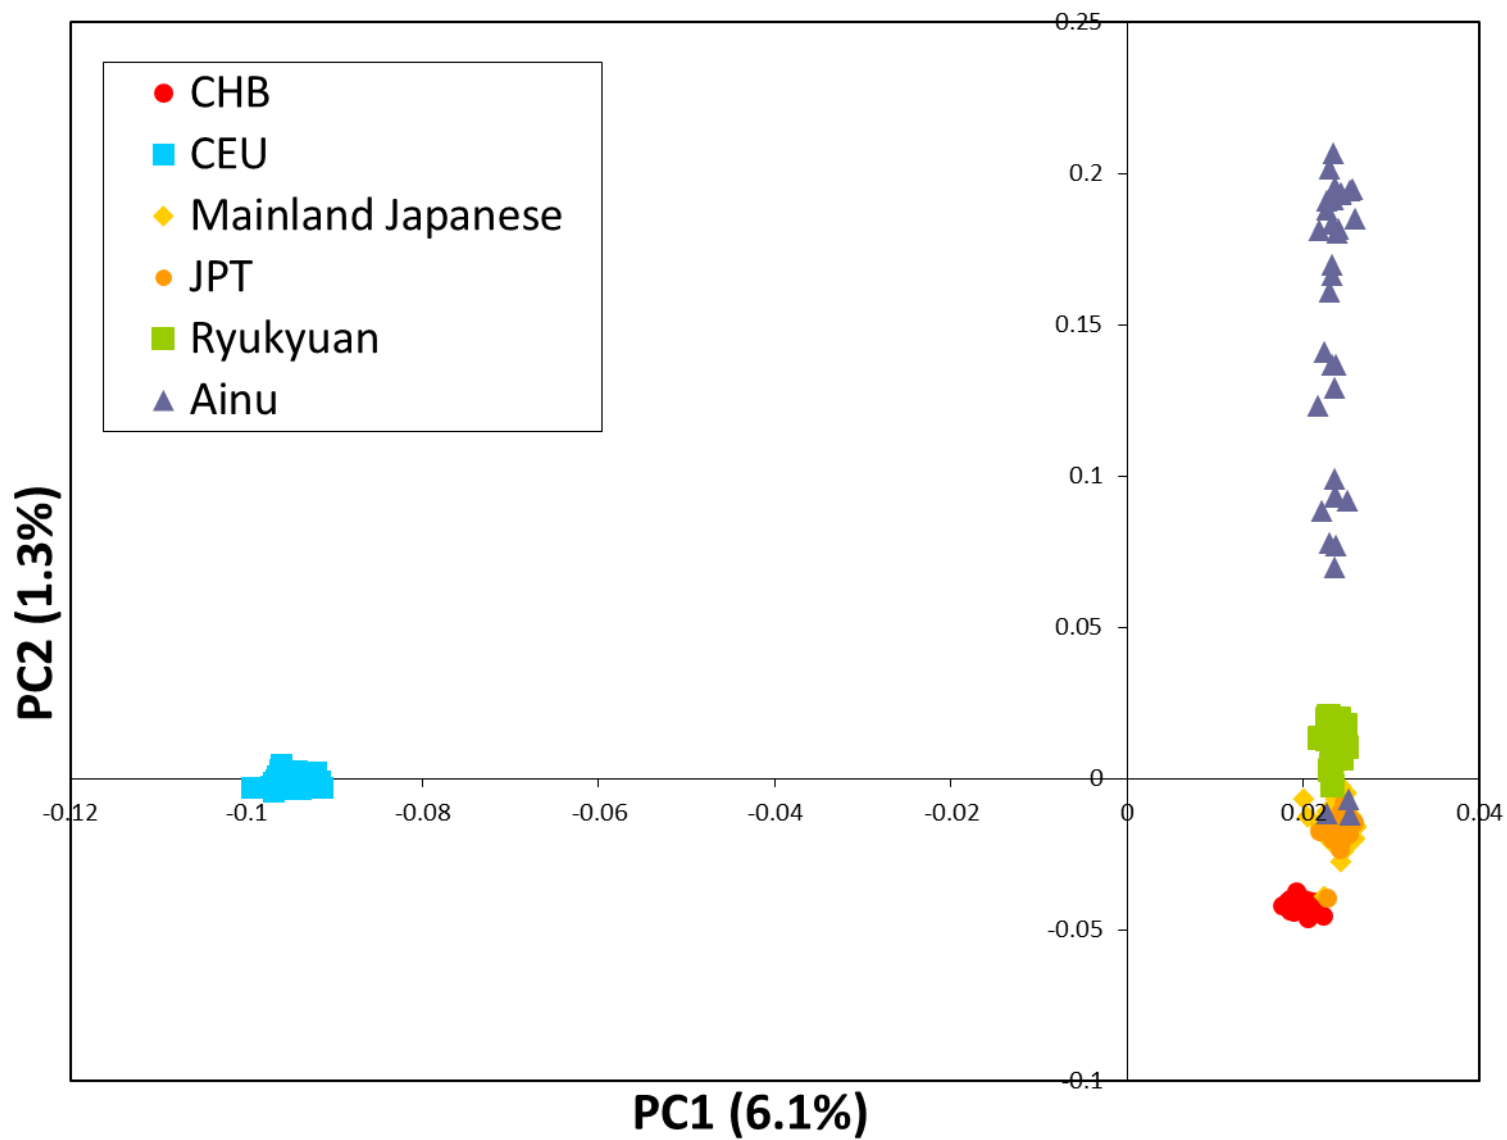

**Supplementary Figure 3.** Correlation between PC1 coordinates from Figure 1A (X-axis) and allele sharing distances (Y-axis) between Ainu and Mainland Japanese individuals. PC1 coordinates have been normalized to range from 0 to 1, so that 0 represents the closest proximity to the Mainland Japanese cluster. Pairwise allele sharing distance between Ainu and Mainland Japanese individuals was computed using AWclust<sup>1</sup> and was averaged to obtain values on the y-axis.

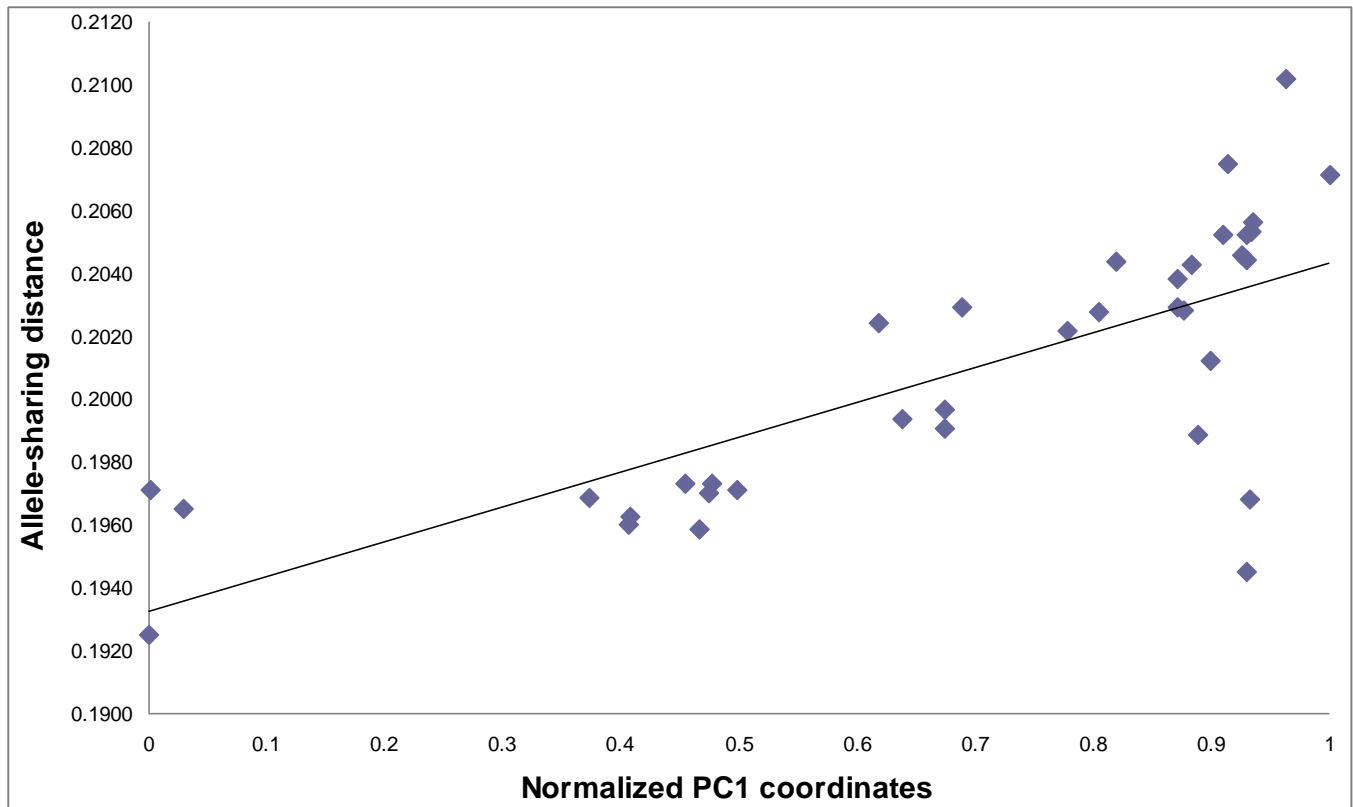

**Supplementary Figure 4.** Correlation between PC1 coordinates from Figure 1A (X-axis) and proportions of Ainu ancestry from *frappe* analysis at  $k=2$  (blue-colored ancestry component in Fig. 2). PC1 coordinates have been normalized to range from 0 to 1, so that 0 represents the closest proximity to the Mainland Japanese cluster.

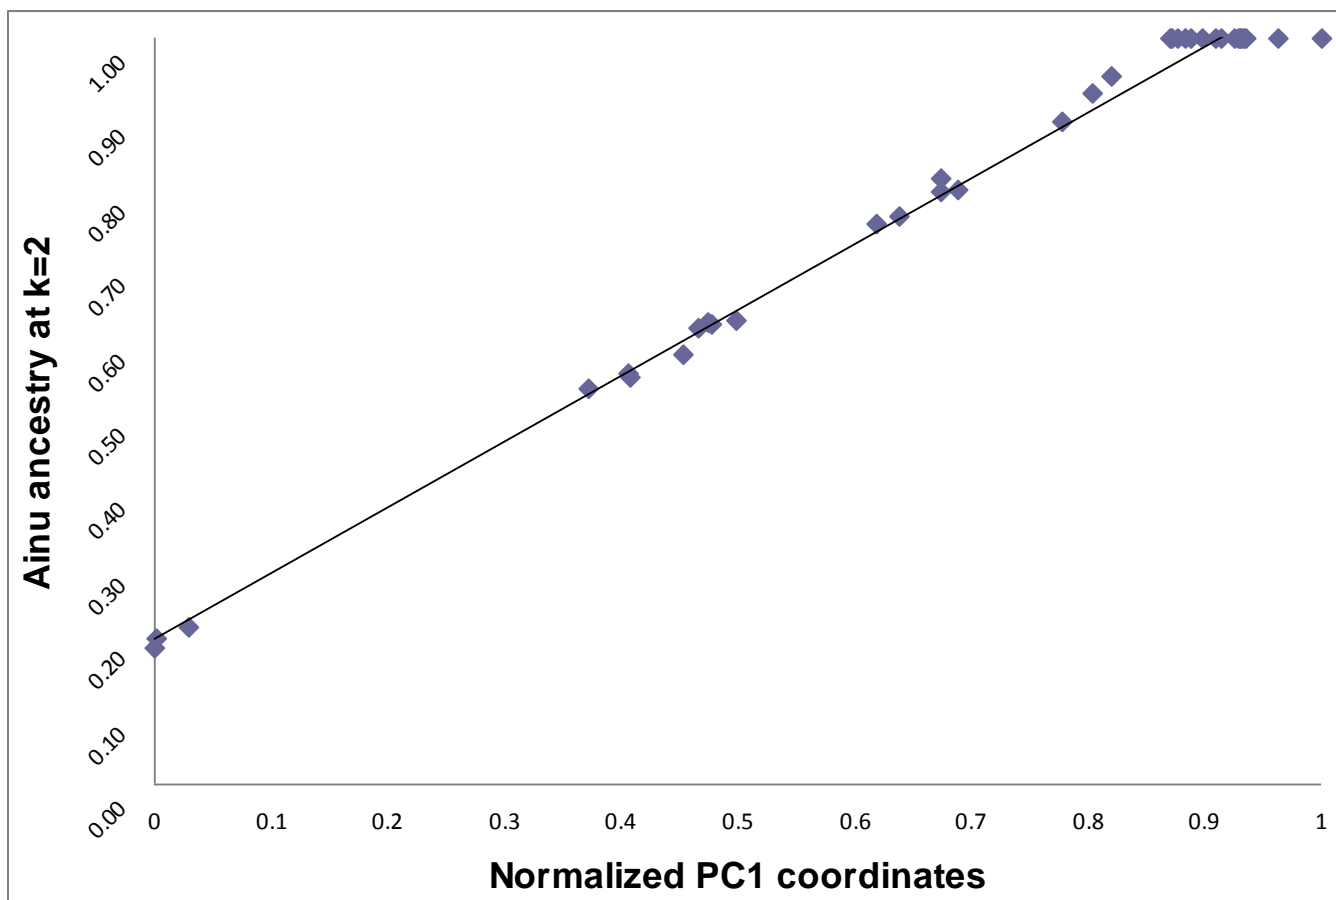

**Supplementary Figure 5.** Correlation between PC2 coordinates from Figure 1A (X-axis) and proportions of Ainu ancestry from *frappe* analysis at k=4 (purple-colored ancestry component in Fig. 2). PC2 coordinates have been normalized to range from 0 to 1, so that 1 represents the maximum value of PC2.

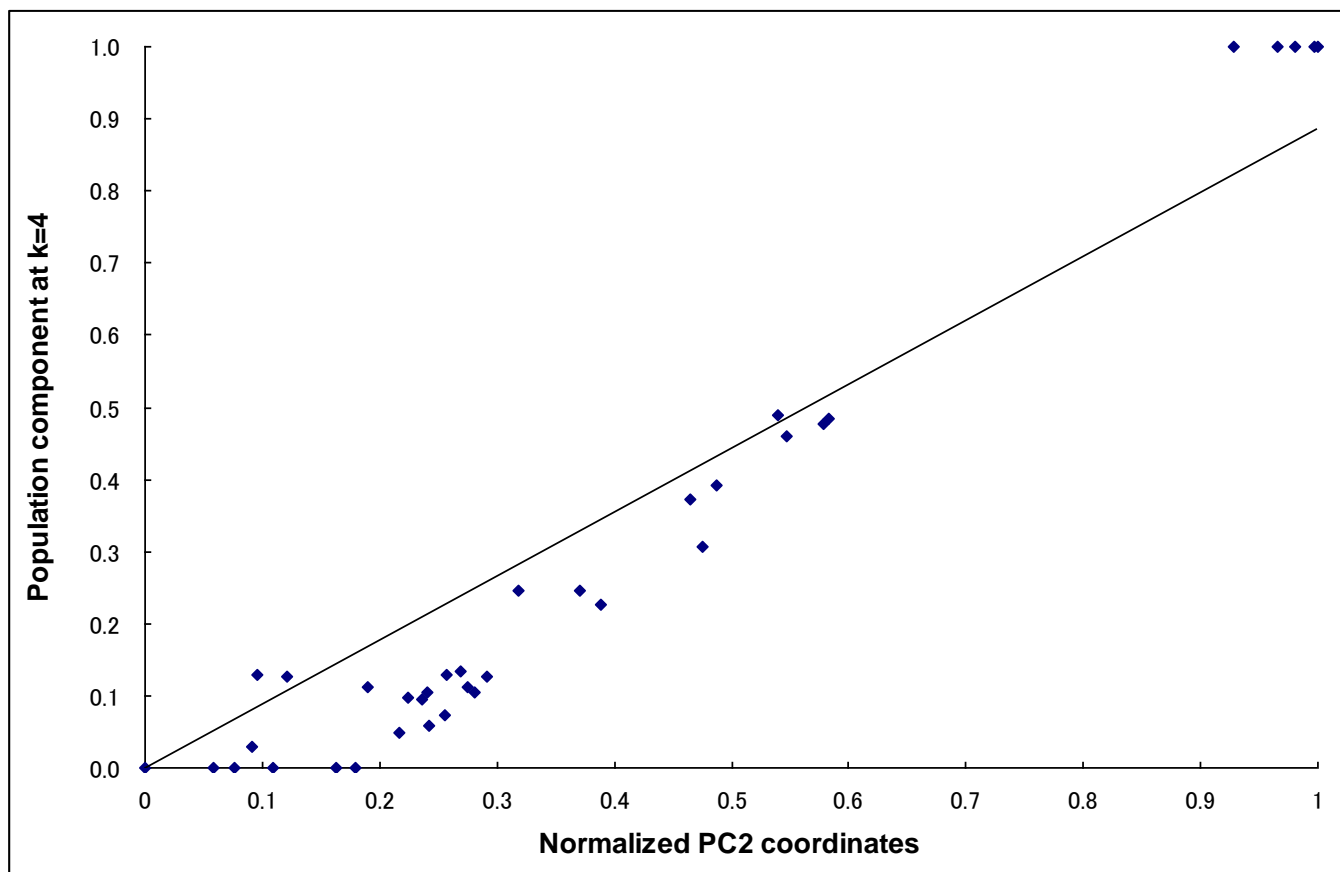

**Supplementary Figure 6:** Results of frappe analysis using the Japanese populations dataset merged with HGDP-CEPH populations listed in Supplementary Table 2. Results from  $k=2$  to  $k=6$  are shown.

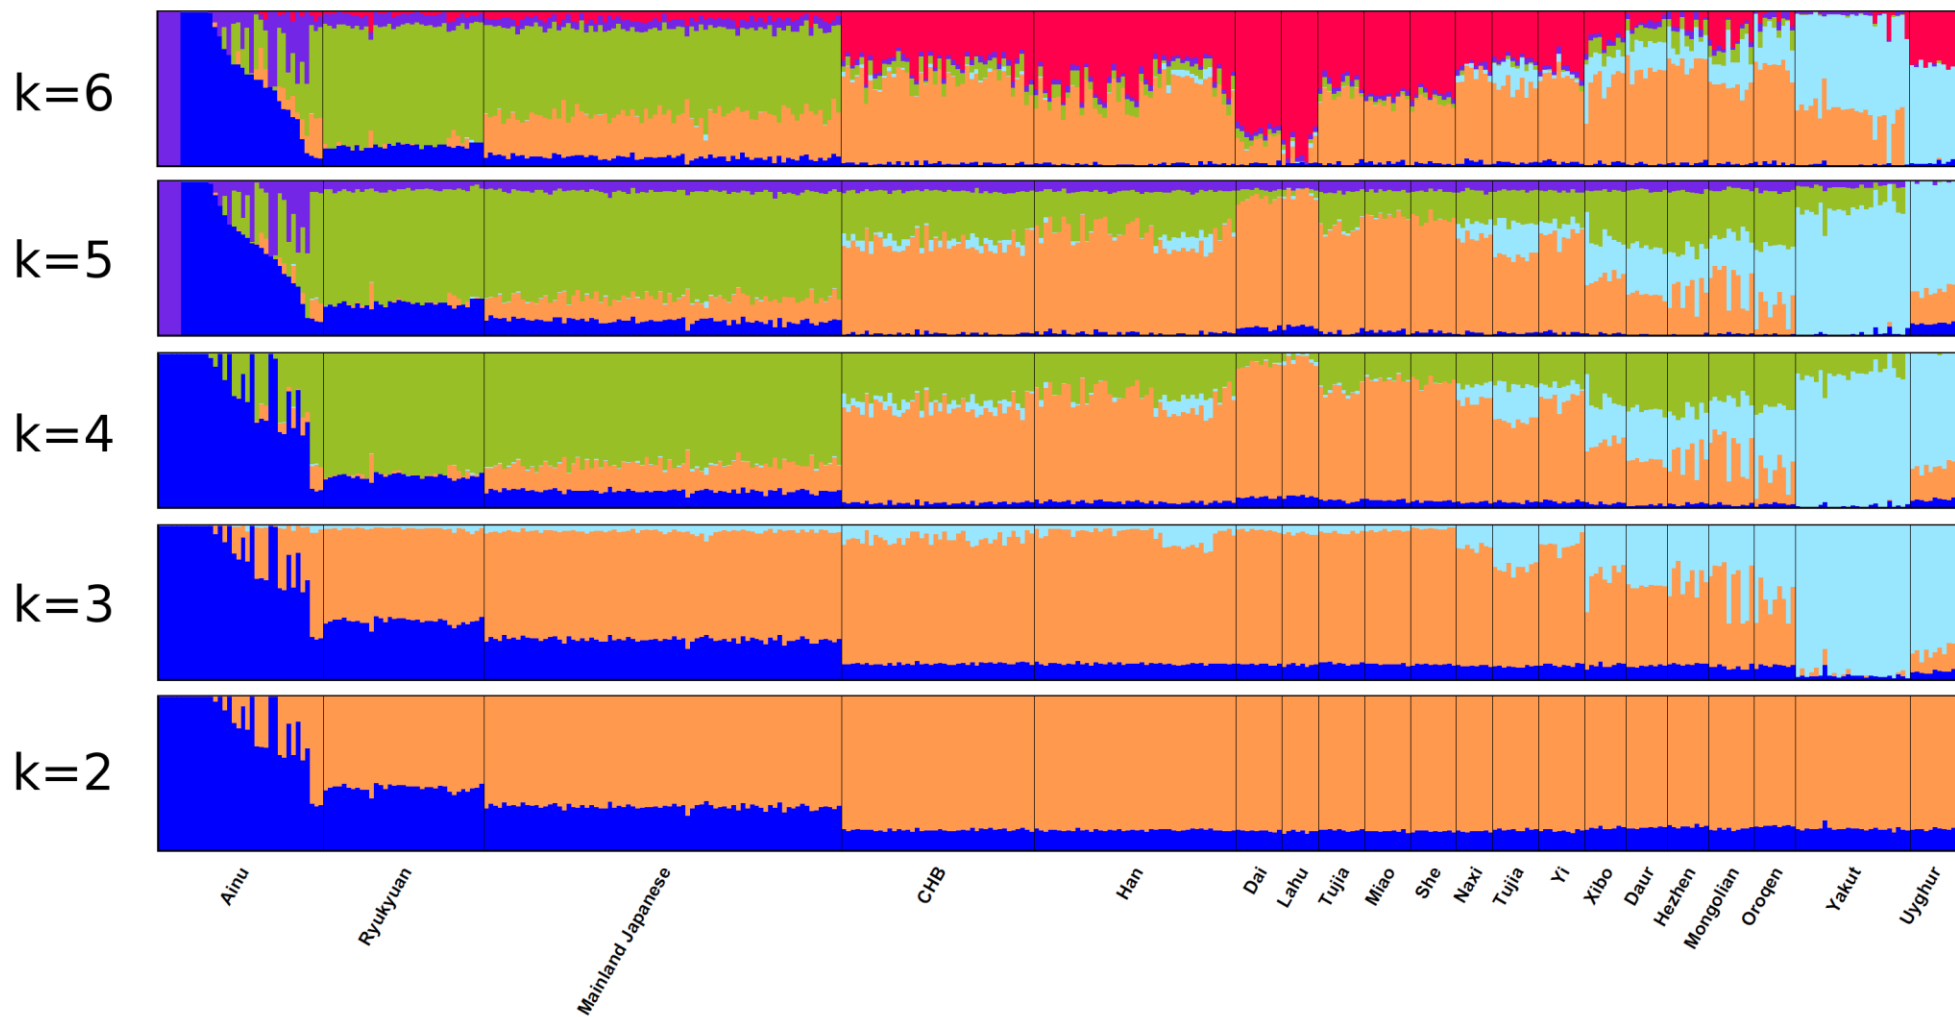



**Supplementary Figure 7:** Results of frappe analysis using the Japanese population dataset merged with HGDP-CEPH and PASNP populations listed in Supplementary Table 2. Results from  $k=2$  to  $k=7$  are shown.

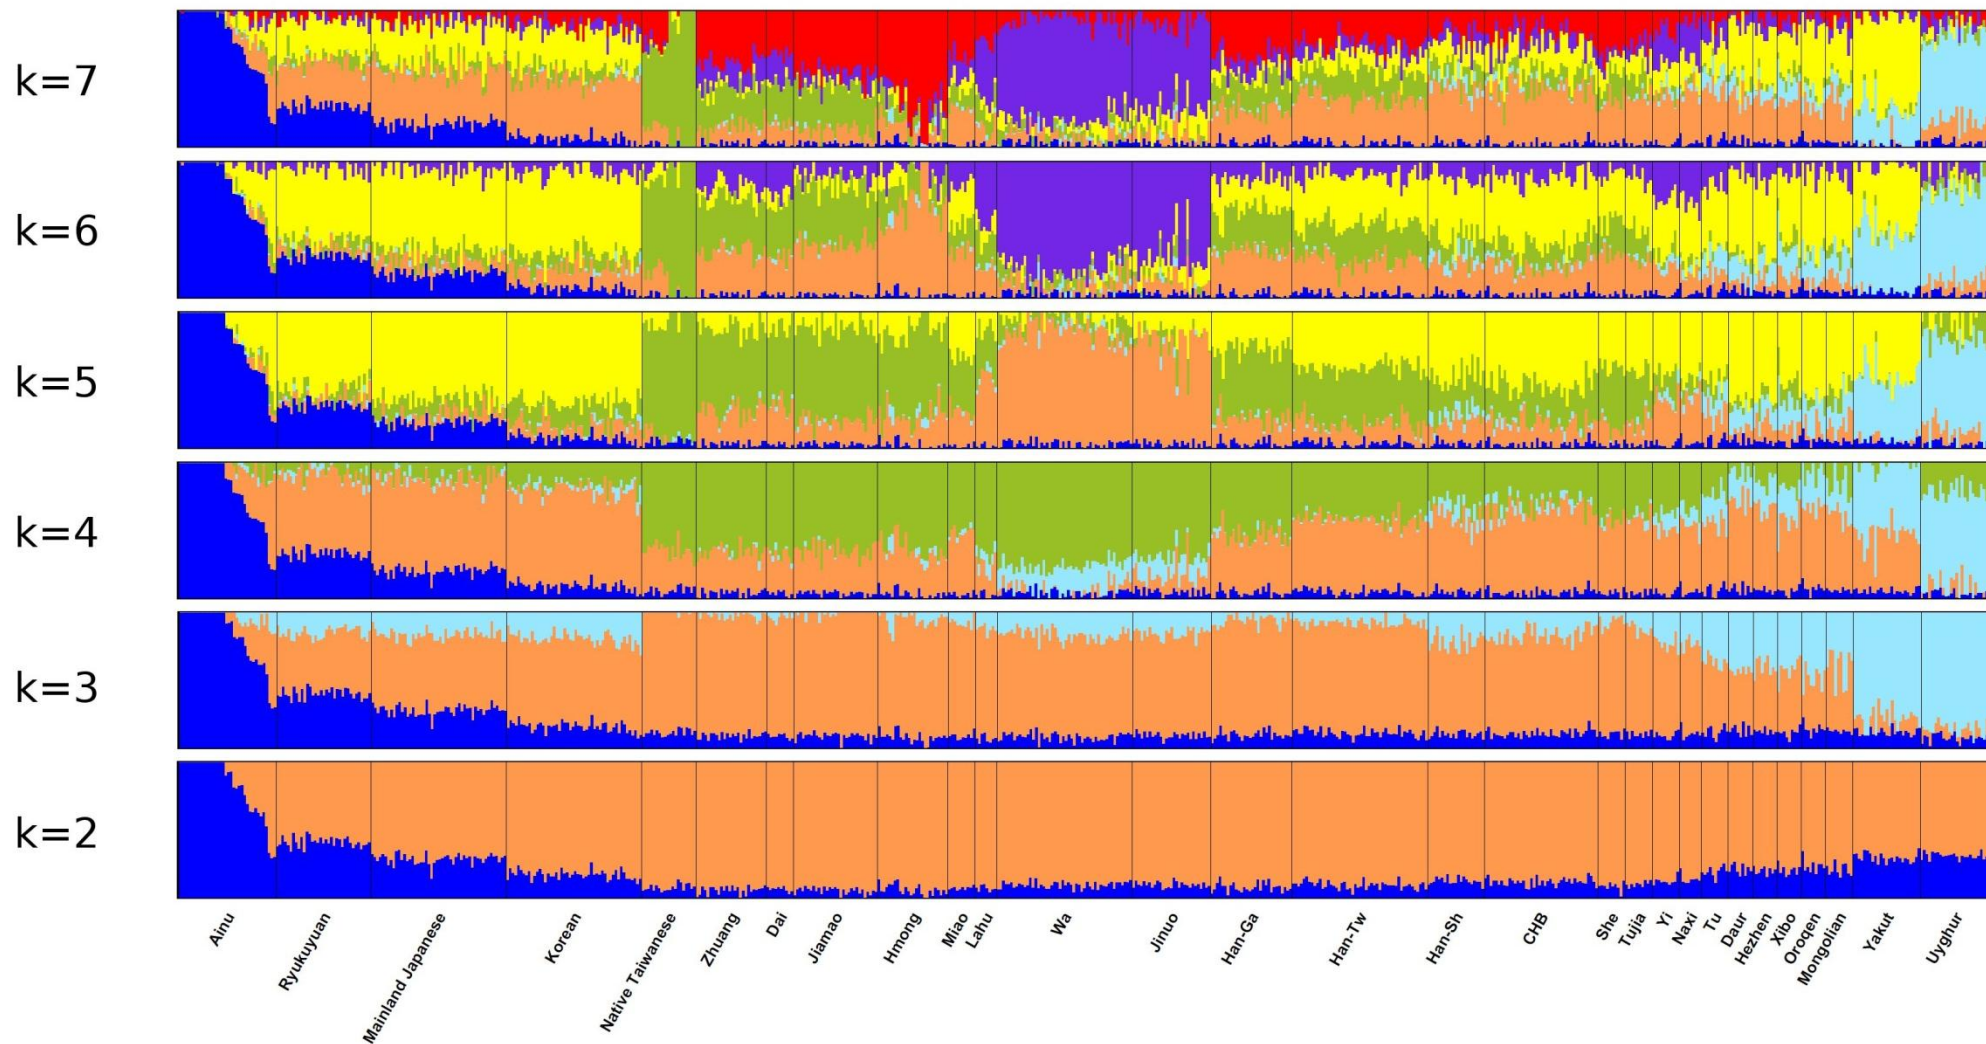

**Supplementary Figure 8:** Maximum-likelihood tree using approximately 600,000 SNP in the three Japanese populations and HapMap Han Chinese from Beijing.

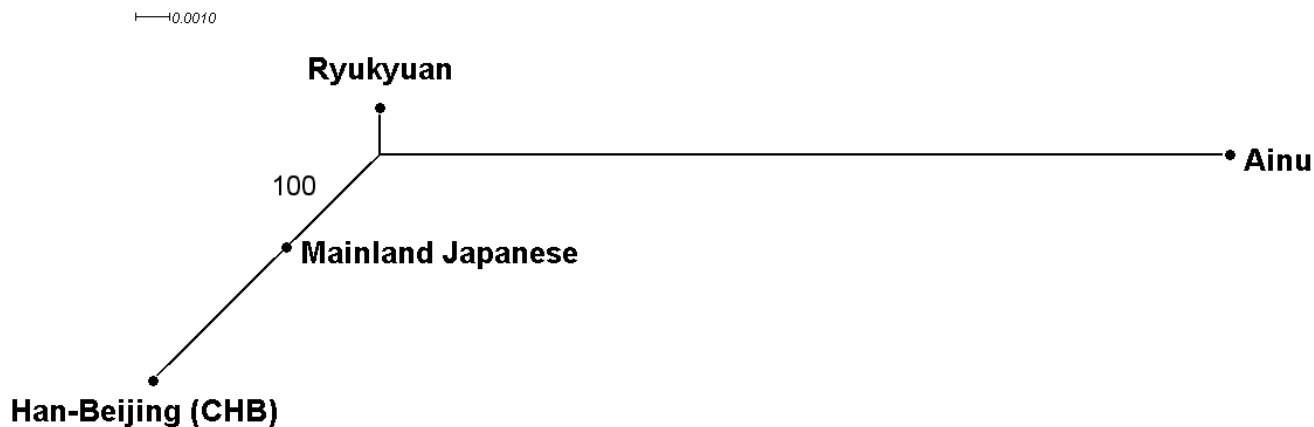

Supplementary Figure 9. A phylogenetic network constructed using the same distance matrix used for Figure 4(A).

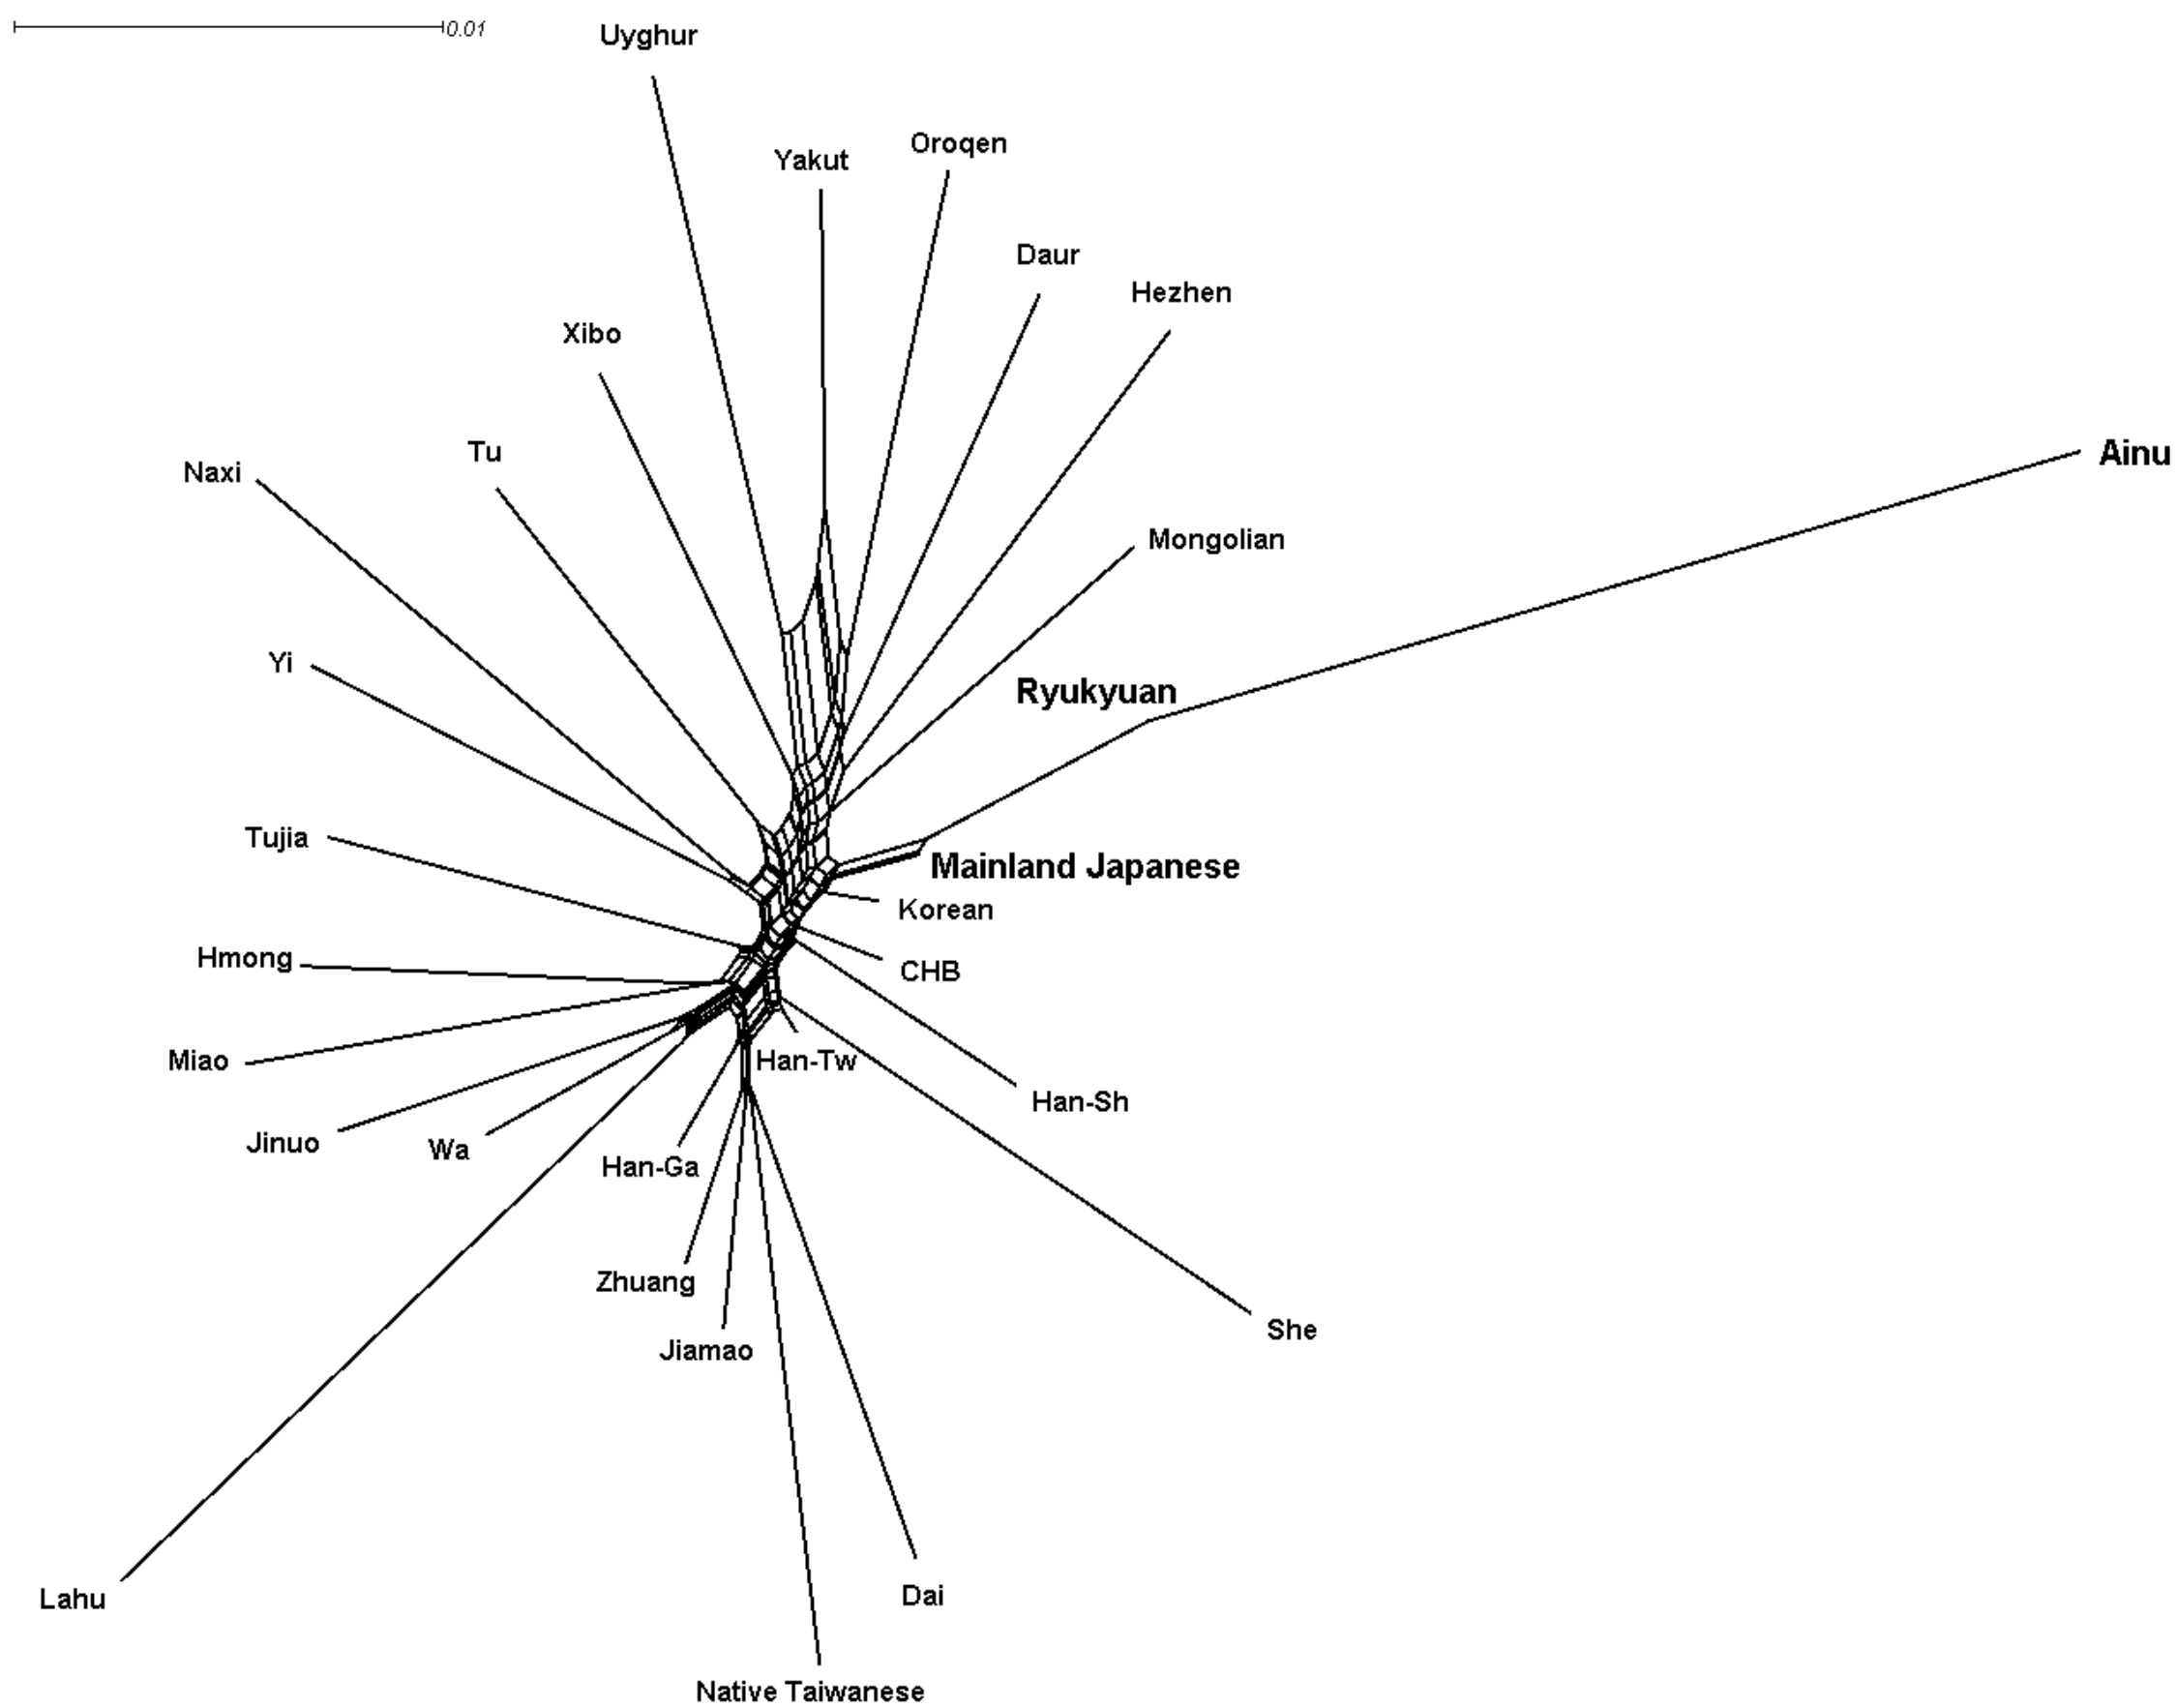

**Supplementary Figure 10.** A phylogenetic network constructed using the same distance matrix used for Figure 4(B).

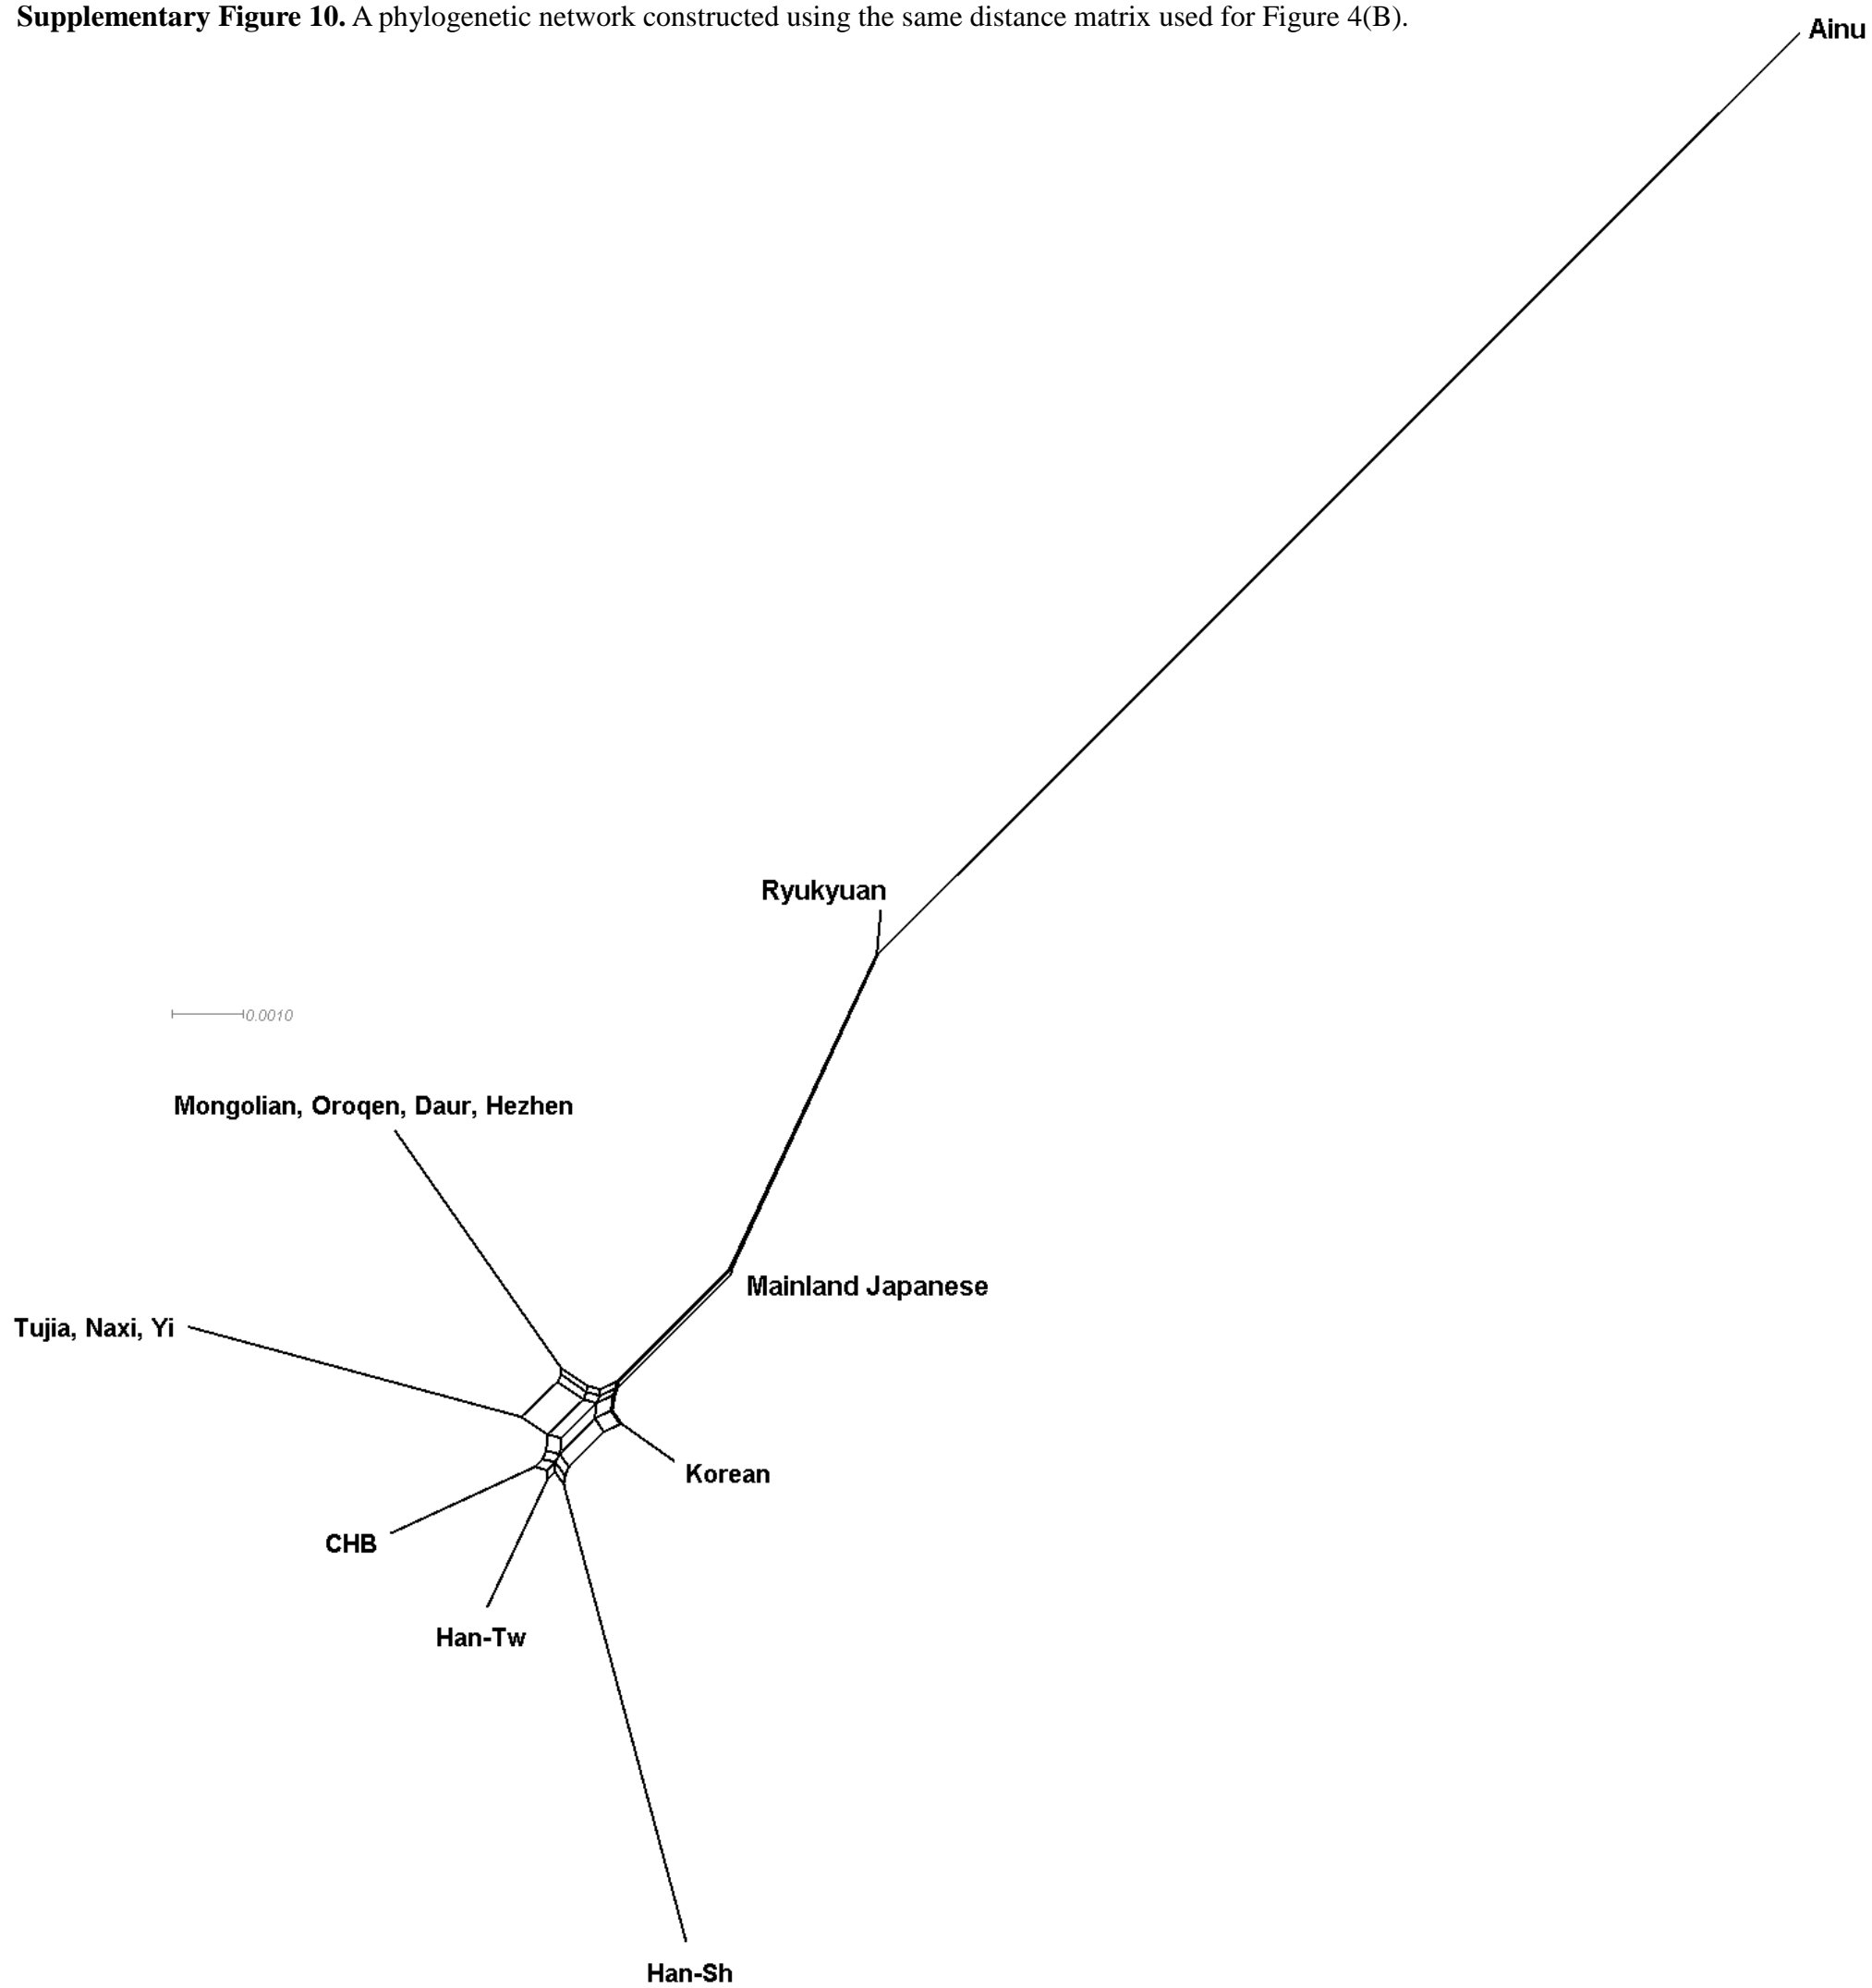

**Supplementary Figure 11.** Distribution of Affymetrix Contrast QC (CQC) values for 36 Ainu samples on PCA plot of Figure 2(A). Samples with QCQ values below 0.4 are interpreted as having failed this QC step as recommended by Affymetrix.

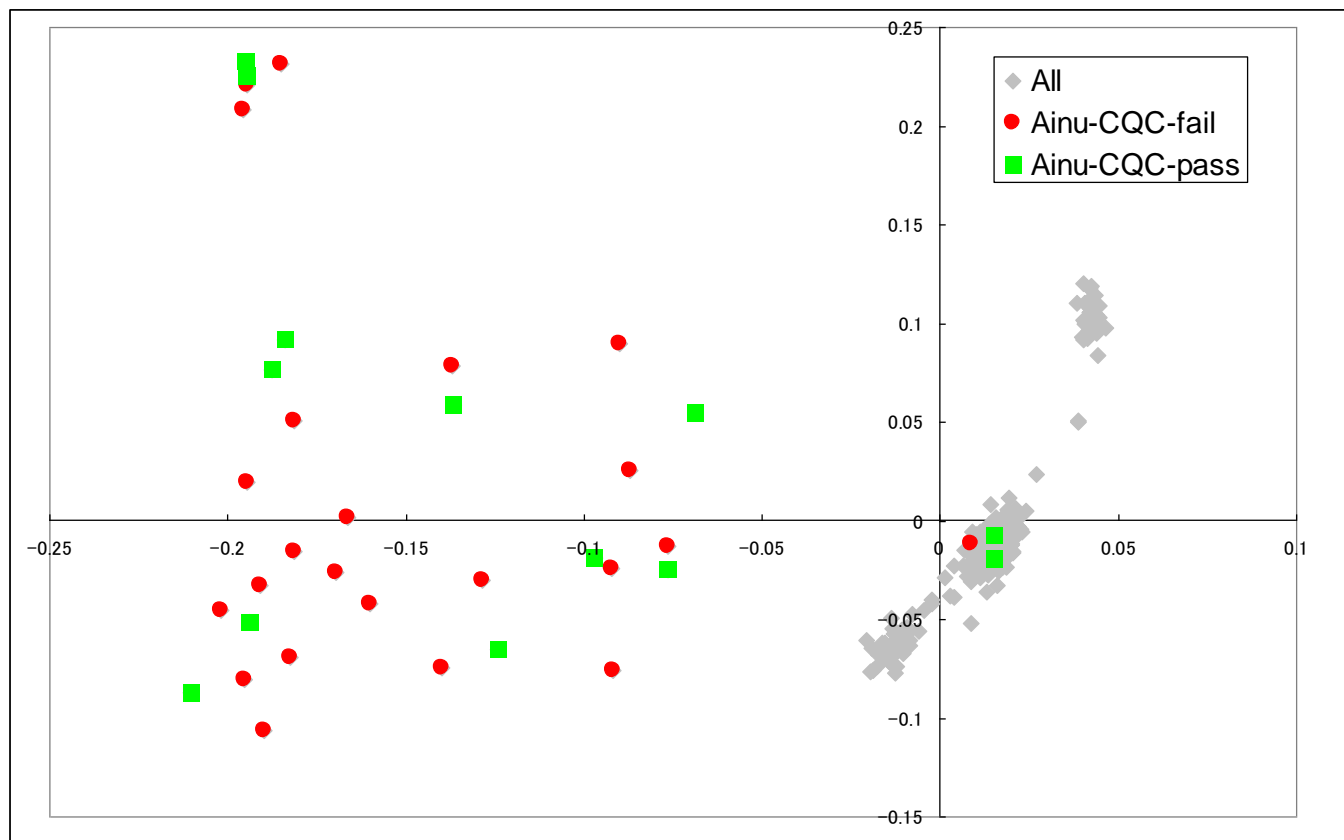

**Supplementary Figure 12:** PCA plots of Japanese and Han-Chinese populations using SNP sets obtained from different SNP genotyping call rate thresholds. A) 90% call rate (1106 SNP omitted, 684907 SNP remaining). B) 100% call rate (215061 SNP omitted, 470952 SNP remaining).

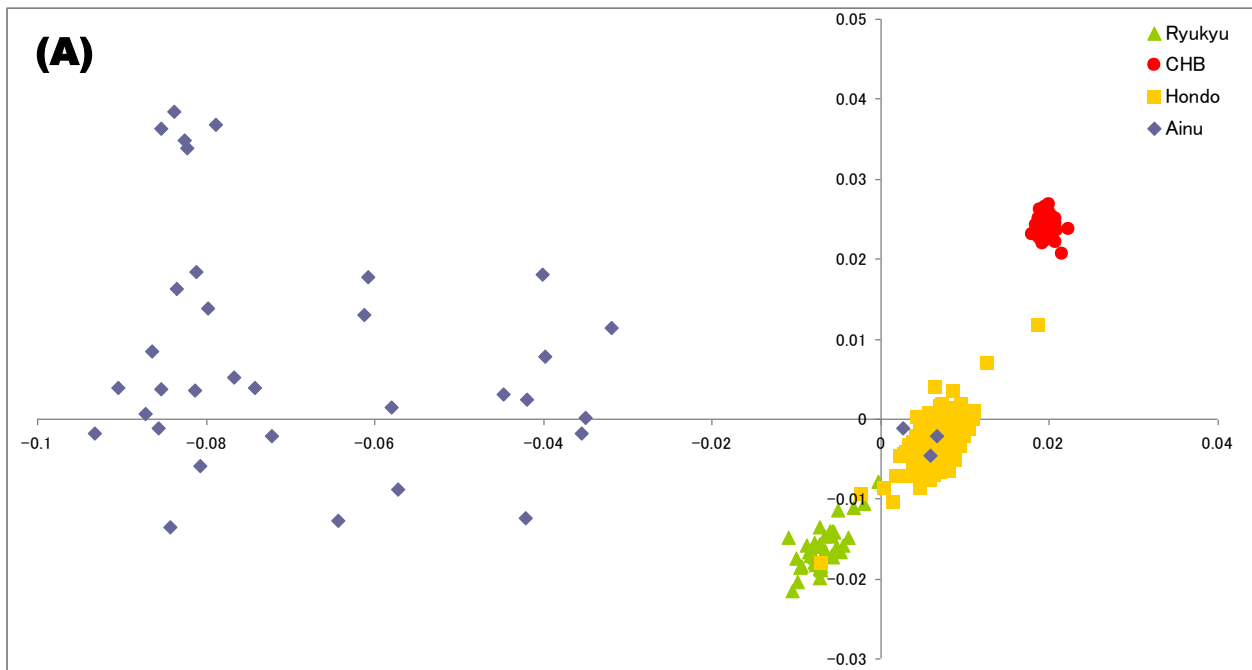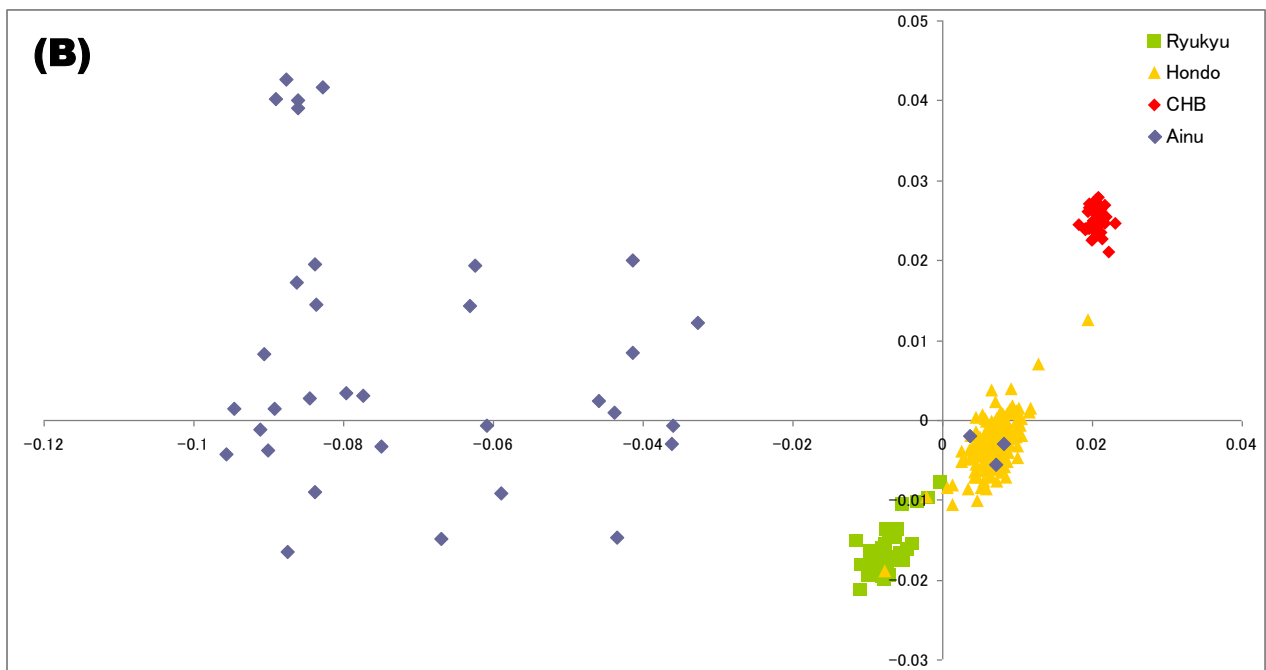

**Supplementary Figure 13:** A) PCA plot using 13 Ainu samples which passed Affymetrix cQC threshold of 0.4. A total number of 825,484 good quality SNPs were used. B) PCA plot using 23 Ainu samples which did not pass the Affymetrix cQC threshold of 0.4. Total number of SNPs used was 641,314.

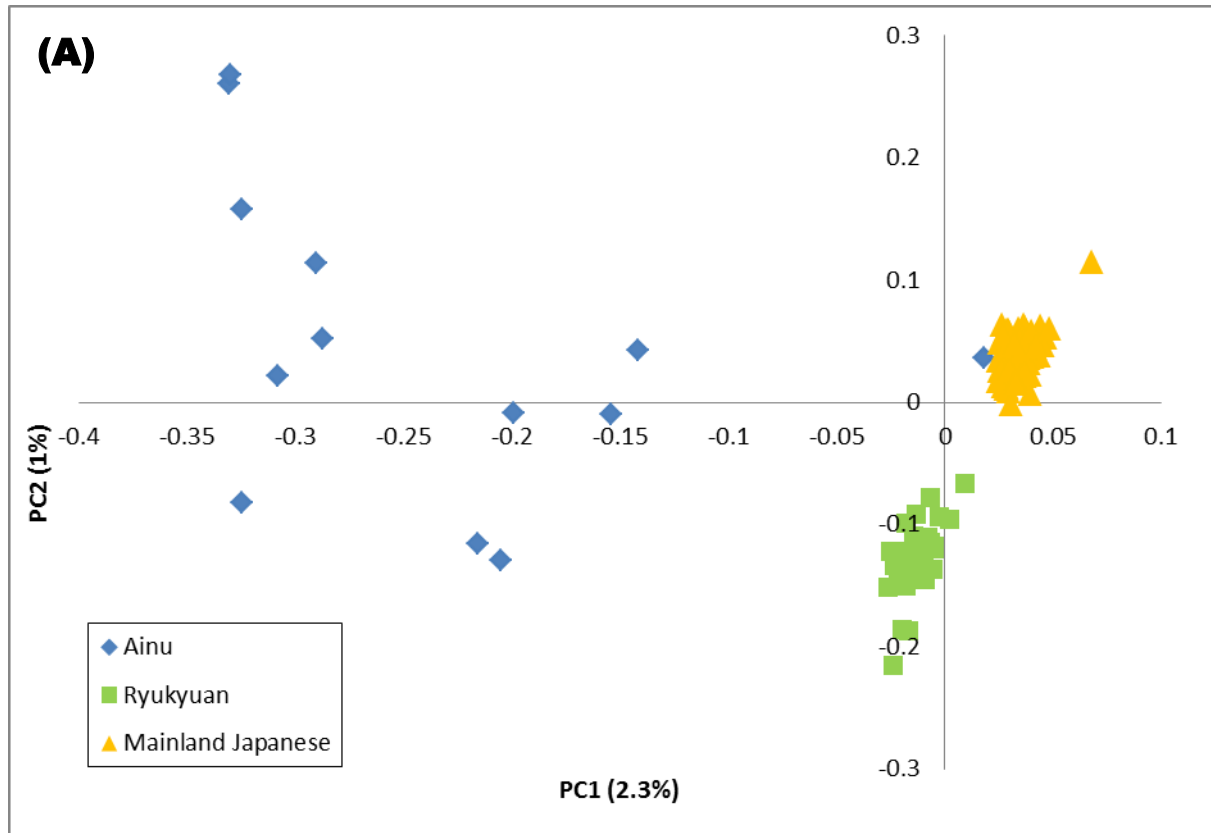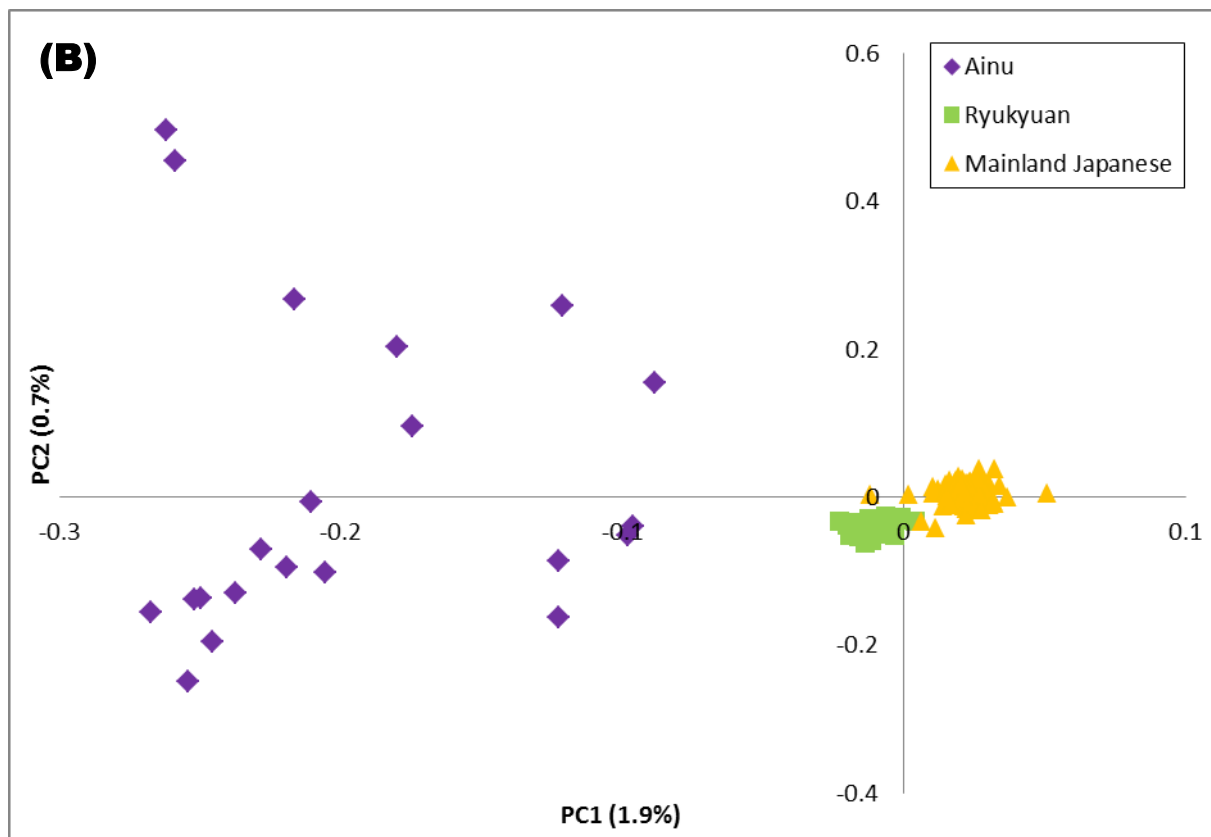

### **Supplementary references**

1. Gao, X. & Starmer, J. D. AWclust: point-and-click software for non-parametric population structure analysis. *BMC Bioinformatics* 9, 77 (2008).
